# Supplementary material for: Thermoresponsive and biocompatible poly(N-isopropylacrylamide)–cellulose nanocrystals hydrogel for cell growth
Source: Royal Society of Chemistry journal article supplement (doi:10.1039/d3ma00495c), 2023-12-05
Supplement: d3ma00495c1.pdf [file d3ma00495c1.pdf]

# Supplemental material for: Thermoresponsive and biocompatible poly(N-isopropylacrylamide)-cellulose nanocrystals hydrogel for cell growth

Anna Trubetskaya<sup>a,b,\*</sup>, Jenni Leppiniemi<sup>c,d</sup>, Sami Lipponen<sup>e</sup>, Salvatore Lombardo<sup>f</sup>, Wim Thielemans<sup>f</sup>, Thaddeus Maloney<sup>g</sup>, Timo Pääkkönen<sup>h</sup>, Kavindra Kumar Kesari<sup>i</sup>, Janne Ruokolainen<sup>i</sup>, Vesa P. Hytönen<sup>c,d</sup>, Eero Kontturi<sup>j,\*\*</sup>

<sup>a</sup>Department of Biosciences, Nord University, Bodø, Norway

<sup>b</sup>Department of Chemistry, University of Limerick, Castletroy, Ireland

<sup>c</sup>Faculty of Medicine and Health Technology and BioMediTech, Tampere University, 33014 Tampere, Finland

<sup>d</sup>Fimlab Laboratories, Biokatu 4, 33520 Tampere, Finland

<sup>e</sup>Polymer Technology, School of Chemical Engineering, Aalto University, 02150 Espoo, Finland

<sup>f</sup>Sustainable Materials Lab, Department of Chemical Engineering, KU Leuven, campus Kulak Kortrijk, Etienne Sabbelaan 53, 8500 Kortrijk, Belgium

<sup>g</sup>Department of Chemical Engineering, Aalto University, 02150 Espoo, Finland

<sup>h</sup>Nordic Bioproducts Group Oy, Tietotie 1, 02150 Espoo, Finland

<sup>i</sup>Department of Applied Physics, Aalto University, School of Science, 02150 Espoo, Finland

<sup>j</sup>Department of Bioproducts and Biosystems, Aalto University, 02150 Espoo, Finland

---

## S-1. Methodology - Osmotic dehydration

Hydrogels were prepared at the laboratory scale using the osmotic dehydration principle, as illustrated in Figure S-1.

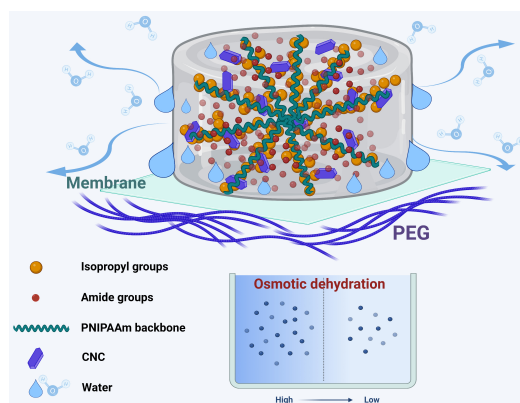

**Figure S-1:** Schematic of crosslinking of PNIPAAm-cellulose nanocrystals to form hydrogel using osmotic dehydration at room temperature.

\*Corresponding author. email: anna.trubetskaya@nord.no

\*\*Corresponding author. email: eero.kontturi@aalto.fi

## S-2. Methodology - Biocompatibility studies

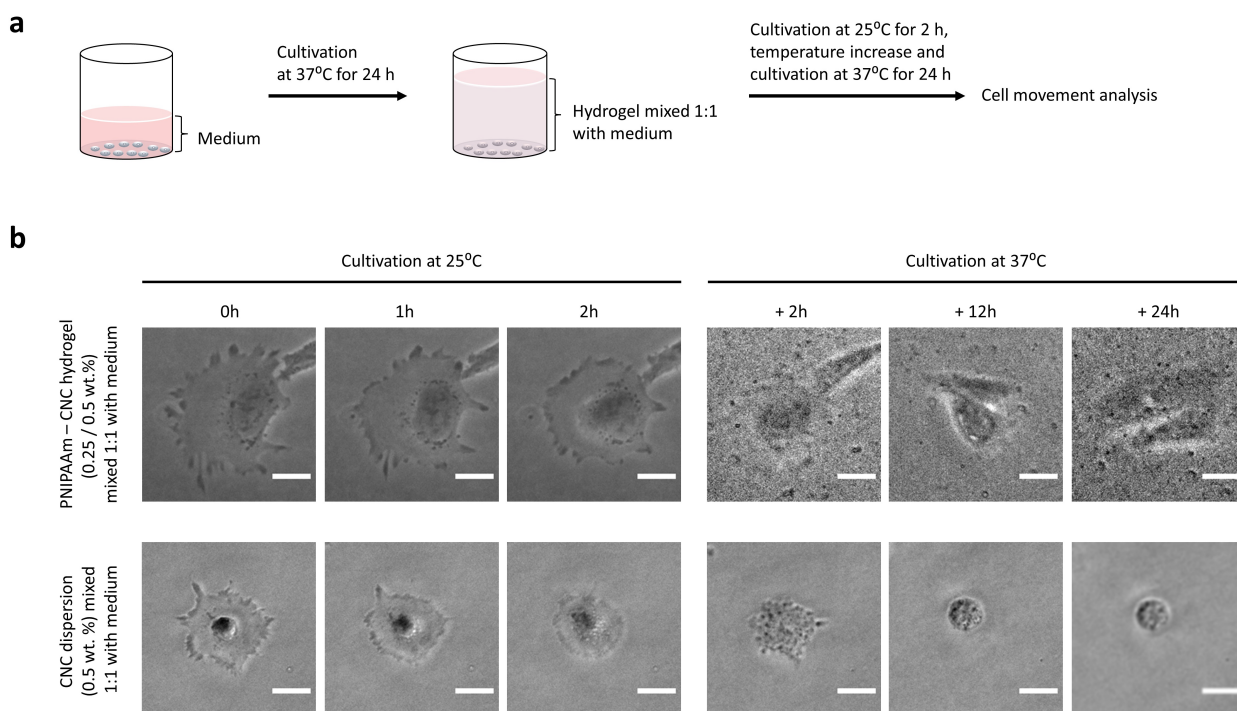

**Figure S-2:** This Figure is related to Figure 7 in the main manuscript. Biocompatibility of the hydrogel and temperature-mediated actuation of the cells using different setups. (a) Schematic of the alternative biocompatibility assay setup. Hydrogel was mixed 1:1 with cell culture medium, and the mixture was applied on top of cells. Samples were incubated at 25°C and 5% CO<sub>2</sub> for 2 h and time-lapse imaged every 10 min. Then the temperature was increased to 37°C and the cells were incubated for 24 h while time-lapse imaging was continued at every 10 min. The images were taken with 20x objective by EVOS FL auto microscope. Snapshots of single cells below PNIPAAm-CNC hydrogel mixed 1:1 with medium or CNC solution mixed 1:1 with medium at different time points are shown.

### S-3. Interaction between PNIPAAm and CNCs

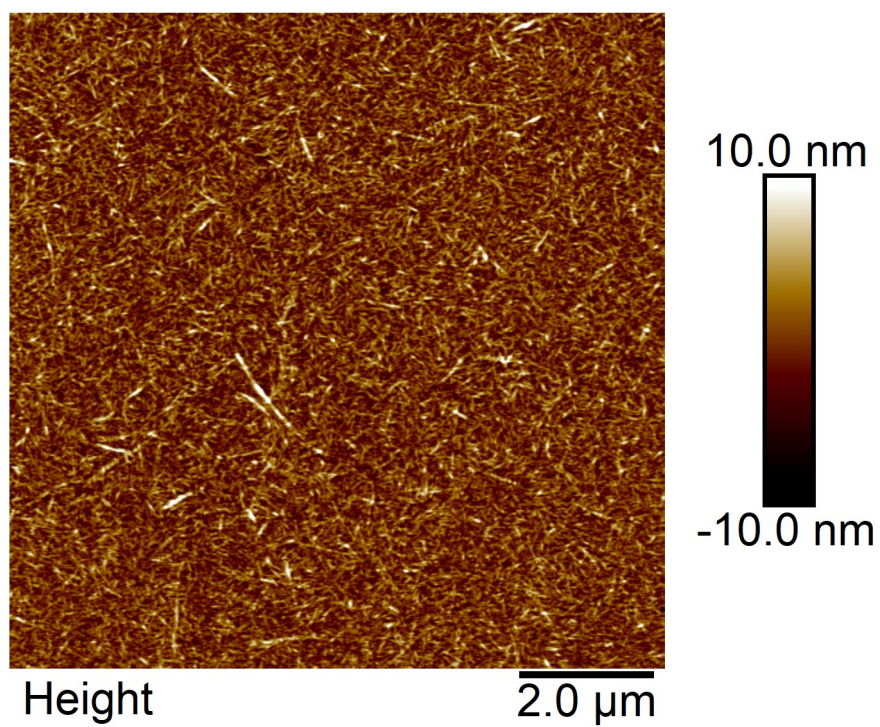

**Figure S-3:** AFM image of carboxylated CNCs from dissolving pulp. The RMS (root-mean-square) roughness of the film is 2.17 nm.

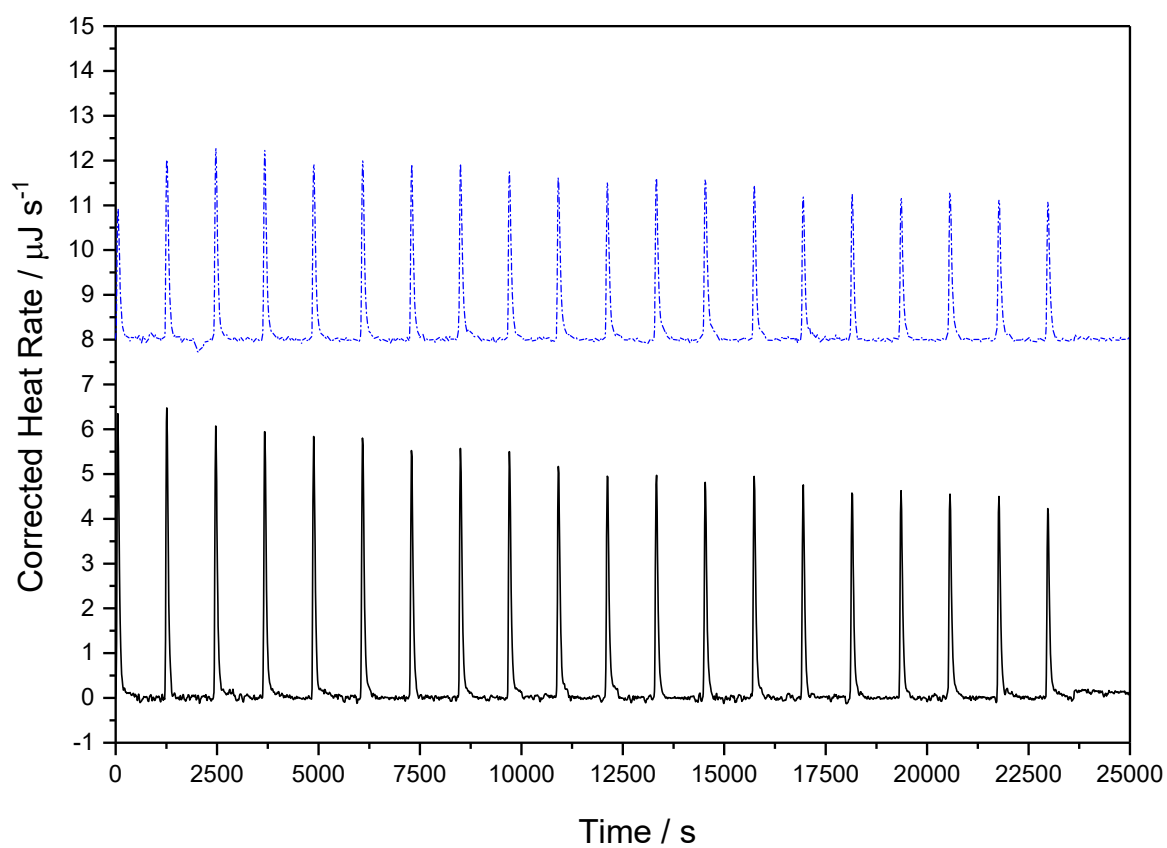

**Figure S-4:** Calorimetric trace (solid line) with the dilution of 3.8 wt.% PNIPAAm to water (dash dotted line).

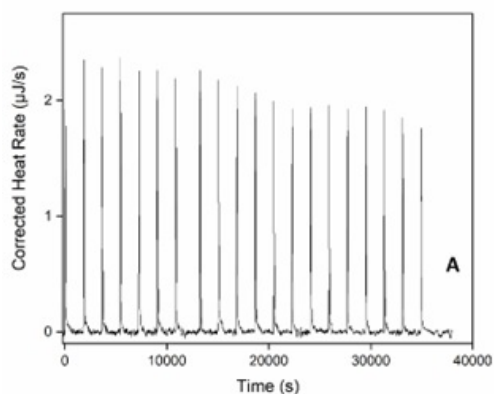

(a) 2 wt. % PNIPAAm; 0.5 wt. % CNC

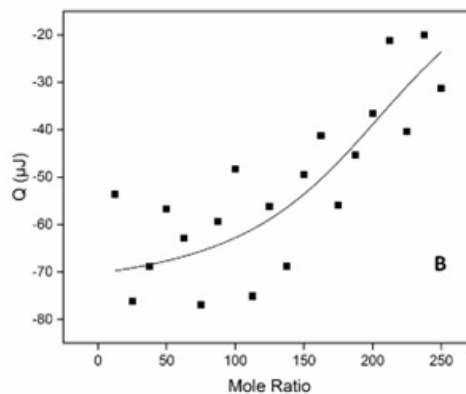

(b) 2 wt. % PNIPAAm; 0.5 wt. % CNC

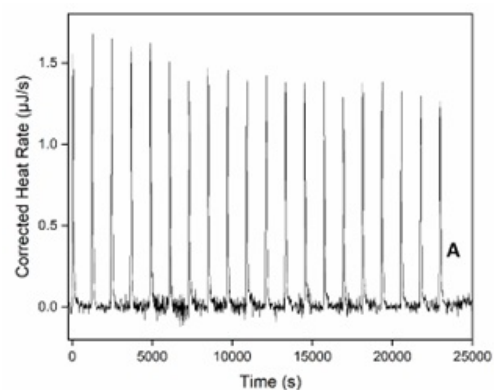

(c) 2 wt. % PNIPAAm; 0.25 wt. % CNC

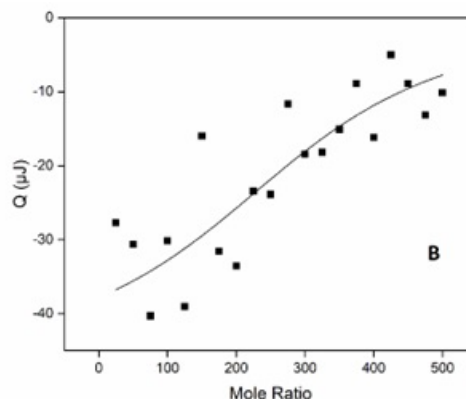

(d) 2 wt. % PNIPAAm; 0.25 wt. % CNC

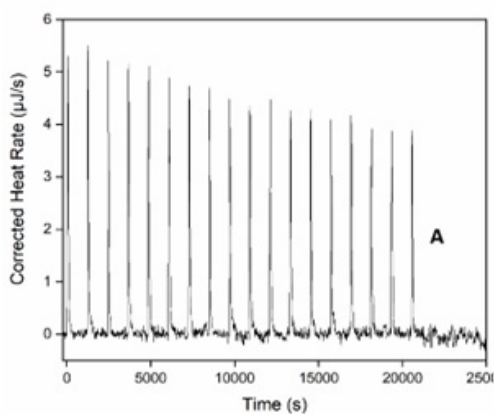

(e) 3.8 wt. % PNIPAAm; 0.25 wt. % CNC

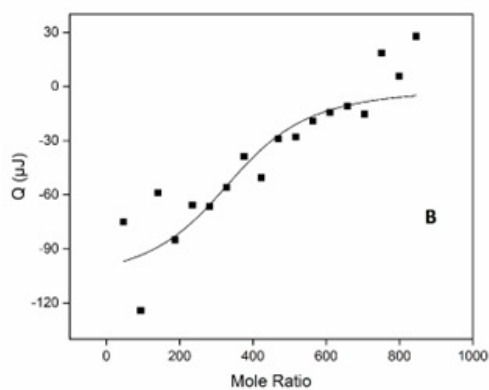

(f) 3.8 wt. % PNIPAAm; 0.25 wt. % CNC

**Figure S-5:** (A) Isothermal titration calorimetric trace (ITC) to study the thermodynamic characteristics of the interaction between CNC and PNIPAAm; (B) Integral plot obtained performing subsequent injections of 10  $\mu\text{L}$  2-3.8 wt. % PNIPAAm to 800  $\mu\text{L}$  0.25-0.5 wt. % CNC, and fit according to the Levenberg-Marquardt algorithm. Chemical structures of the compounds of interest and values obtained by ITC for the adsorption of PNIPAAm on CNCs.

**Table S-1:** DSC endotherms of 0.25-4 wt.% PNIPAAm - 0.5, 3.5, 6 % CNC hydrogels.

| CNCs, wt.% | PNIPAAm, wt.% | endo at °C | J g <sup>-1</sup> at ≈ 30°C | endo at °C | J g <sup>-1</sup> at ≈ -10°C |
|------------|---------------|------------|-----------------------------|------------|------------------------------|
| 0.5        | 0.25          | 32.1       | 0.13                        |            |                              |
|            | 0.5           | 31.6       | 0.09                        | -10.2      | 7.4                          |
|            | 1             | 31.2       | 0.18                        | -9.5       | 9.6                          |
|            | 2             | 30.8       | 0.31                        | -9.8       | 13                           |
|            | 4             | 32         | 1                           | -10.4      | 1                            |
| 3.5        | 0.25          |            |                             |            |                              |
|            | 0.5           | 32.3       | 0.93                        | -10.3      | 1.2                          |
|            | 1             | 32.2       | 0.35                        | -10.3      | 4.2                          |
|            | 2             | 30.8       | 0.44                        | -10.2      | 8.3                          |
|            | 4             | 32.5       | 0.9                         | -10.3      | 0.4                          |
| 6          | 0.25          |            |                             | -9.3       | 8.7                          |
|            | 0.5           | 30.7       | 0.09                        | -10.2      | 7.7                          |
|            | 1             | 30.5       | 0.22                        | -10        | 7.8                          |
|            | 2             | 32         | 0.32                        | -9.7       | 4.8                          |
|            | 4             | 31.3       | 0.74                        | -9.8       | 5                            |

#### S-4. Rheology

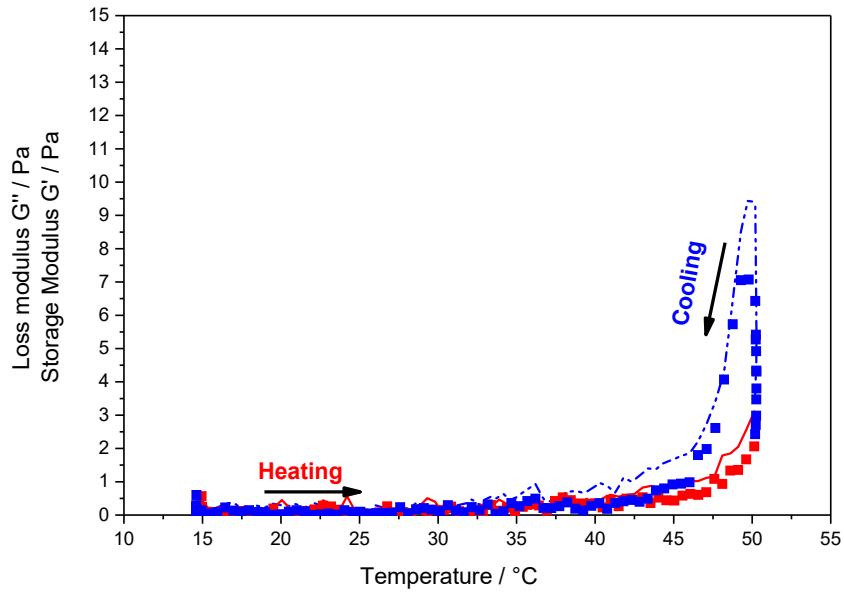

**Figure S-6:** Storage and loss modulus of pure 0.25 wt. % PNIPAAm.

## S-5. Supplementary videos

Movies S1-S6 contain original time-lapse data of cell cultivation at 25°C and 37°C for medium control 1 and 2, PNIPAAm (0.25 wt. %) - CNC (0.5 wt. %) hydrogel, PNIPAAm (0.25 wt. %) - CNC (0.5 wt. %) hydrogel mixed 1:1 with medium, CNC (0.5 wt. %) dispersion, CNC (0.5 wt. %) dispersion mixed 1:1 with medium. Movies S7-S14 contain original original time-lapse data of cell cultivation either at 25°C, or at 37°C, where the movement of individual cells have been tracked.

Supplementary Movie S1: Cell cultivation at 25C\_37C\_Medium control 1

Supplementary Movie S2: Cell cultivation at 25C\_37C\_Medium control 2

Supplementary Movie S3: Cell cultivation at 25C\_37C\_PNIPAAM\_CNC hydrogel

Supplementary Movie S4: Cell cultivation at 25C\_37C\_PNIPAAM\_CNC hydrogel mixed with medium

Supplementary Movie S5: Cell cultivation at 25C\_37C\_CNC dispersion

Supplementary Movie S6: Cell cultivation at 25C\_37C\_CNC dispersion mixed with medium

Supplementary Movie S7: Cell movement analysis at 25C\_Medium control 1

Supplementary Movie S8: Cell movement analysis at 37C\_Medium control 1

Supplementary Movie S9: Cell movement analysis at 25C\_Medium control 2

Supplementary Movie S10: Cell movement analysis at 37C\_Medium control 2

Supplementary Movie S11: Cell movement analysis at 25C\_CNC\_PNIPAM hydrogel

Supplementary Movie S12: Cell movement analysis at 37C\_CNC\_PNIPAM hydrogel

Supplementary Movie S13: Cell movement analysis at 25C\_CNC\_PNIPAM hydrogel mixed with medium

Supplementary Movie S14: Cell movement analysis at 37C\_CNC\_PNIPAM hydrogel mixed with medium
